# Supplementary material
Source: PubMed Central journal article supplement (PMC2745122)

## Supplementary Information for

### “Genomewide Scan Reveals Association of Psoriasis with IL-23 and NF- $\kappa$ B Pathways”

#### The Collaborative Association Study of Psoriasis (CASP)

Rajan P. Nair<sup>1\*</sup>, Kristina Callis Duffin<sup>2\*</sup>, Cindy Helms<sup>3\*</sup>, Jun Ding<sup>4\*</sup>, Philip E. Stuart<sup>1</sup>, David Goldgar<sup>2</sup>, Johann E. Gudjonsson<sup>1</sup>, Yun Li<sup>4</sup>, Trilokraj Tejasvi<sup>1</sup>, Justin Paschall<sup>17</sup>, Mary J. Malloy<sup>18</sup>, Clive R. Pullinger<sup>18</sup>, John P. Kane<sup>18</sup>, Jennifer Gardner<sup>3</sup>, Amy Perlmutter<sup>19</sup>, Andrew Miner<sup>19</sup>, Bing Jian Feng<sup>2</sup>, Ravi Hiremagalore<sup>1</sup>, Robert W. Ike<sup>20</sup>, Henry W. Lim<sup>21</sup>, Enno Christophers<sup>6</sup>, Tilo Henseler<sup>6</sup>, Stefan Schreiber<sup>22,23</sup>, Andre Franke<sup>22</sup>, Andreas Ruether<sup>5</sup>, Michael Weichenthal<sup>6</sup>, Dafna Gladman<sup>7</sup>, Proton Rahman<sup>8</sup>, Steven J. Schrodi<sup>9</sup>, Sampath Prahalad<sup>10</sup>, Stephen L Guthery<sup>10</sup>, Judith Fischer<sup>11</sup>, Wilson Liao<sup>12</sup>, Pui-Yan Kwok<sup>12</sup>, Alan Menter<sup>13</sup>, G. Mark Lathrop<sup>11</sup>, C. Wise<sup>14</sup>, Ann B. Begovich<sup>9</sup>, John J. Voorhees<sup>1</sup>, James T. Elder<sup>1,15</sup>, Gerald G. Krueger<sup>2</sup>, Anne M. Bowcock<sup>3</sup>, Gonçalo R. Abecasis<sup>4</sup>

Affiliations 1-16 are defined in the cover page. The following definitions are for affiliations 17-22:

<sup>17</sup> National Center for Biotechnology Information, National Library of Medicine, National Institutes of Health, Bethesda, Maryland, USA

<sup>18</sup> Cardiovascular Research Institute and Center for Human Genetics, University of California-San Francisco, CA

<sup>19</sup> Department of Psychiatry, Washington University School of Medicine, St. Louis, MO

<sup>20</sup> Department of Internal Medicine, University of Michigan Medical School, Ann Arbor, MI

<sup>21</sup> Department of Dermatology, Henry Ford Hospital, Detroit, MI

<sup>22</sup> Institute for Clinical Molecular Biology, University of Kiel, Germany

<sup>23</sup> Department of General Medicine, University of Kiel, Germany

## **SUPPLEMENTARY TABLES**

### **Supplementary Table 1 – Summary of Diagnostic Criteria and Key References for Each Sample.**

The table summarizes case and control definitions for each sample, and provides relevant references for previously published sample sets. Note that, although case definitions are broadly comparable, control definitions varied slightly by site: some sites used controls known to be free of psoriasis and other autoimmune disorders, others focused on psoriasis free controls only and yet others relied on population controls. Since psoriasis typically affects <2% of the population, we expect these differences in control definition to play a very minor role in our results.

**Supplementary Table 1. Summary of Diagnostic Criteria and Key References for Each Sample**

| <b>Sample Set and References</b>                          | <b>Case Definition</b>                                                                 | <b>N</b> |
|-----------------------------------------------------------|----------------------------------------------------------------------------------------|----------|
| <b>Discovery Samples</b>                                  |                                                                                        |          |
| Collection of <i>J.T. Elder</i> <sup>1</sup>              | Psoriasis diagnosed by dermatologist*                                                  | 480      |
| Collection of <i>G. Krueger</i> <sup>2,3</sup>            | Psoriasis diagnosed by dermatologist, >18 years of age                                 | 476      |
| Collection of <i>A. Bowcock</i> <sup>4</sup> **           | Psoriasis diagnosed by dermatologist, > 18 years of age, pustular psoriasis excluded   | 453      |
| <b>Follow-up Samples</b>                                  |                                                                                        |          |
| Collection of <i>J.T. Elder</i> <sup>1</sup>              | Psoriasis diagnosed by dermatologist*                                                  | 1642     |
| Collection of <i>M. Weichenthal</i> <sup>5</sup>          | Psoriasis diagnosed by dermatologist                                                   | 718      |
| Celera Follow-up Set 1, <i>A. Begovich</i> <sup>2,3</sup> | Psoriasis diagnosed by dermatologist, PASI score                                       | 498      |
| Celera Follow-up Set 2, <i>A. Begovich</i> <sup>2,3</sup> | Psoriasis diagnosed by dermatologist                                                   | 483      |
| Collection of <i>D. Gladman</i> <sup>***</sup>            | Psoriasis diagnosed by dermatologist                                                   | 691      |
| Collection of <i>J. Fisher</i> <sup>6-8</sup>             | Psoriasis diagnosed by dermatologist, isolated palmoplantar psoriasis excluded         | 346      |
| Collection of <i>A. Bowcock</i> <sup>4</sup> **           | Psoriasis diagnosed by dermatologist, > 18 years of age, pustular psoriasis excluded   | 302      |
| Collection of <i>P. Rahman</i> <sup>9</sup>               | Psoriasis documented by rheumatologist; most cases confirmed by dermatologist          | 368      |
| <b>Sample Set and References</b>                          | <b>Control Definition</b>                                                              | <b>N</b> |
| <b>Discovery Samples</b>                                  |                                                                                        |          |
| Collection of <i>J.T. Elder</i> <sup>1</sup>              | No history of psoriasis, no family history of psoriasis, >18 years of age.             | 702      |
| Collection of <i>G. Krueger</i> <sup>2,3</sup>            | No history of psoriasis or auto-immune disorders in controls or first-degree relatives | 473      |
| Collection of <i>A. Bowcock</i> <sup>4</sup> **           | No history of psoriasis or auto-immune disorders                                       | 261      |
| <b>Follow-up Samples</b>                                  |                                                                                        |          |
| Collection of <i>J.T. Elder</i> <sup>1</sup>              | No history of psoriasis, no family history of psoriasis, >18 years of age.             | 1101     |
| Collection of <i>M. Weichenthal</i> <sup>5</sup>          | “Healthy” population controls with “no active disorders”                               | 1464     |
| Celera Follow-up Set 1, <i>A. Begovich</i> <sup>2,3</sup> | No history of psoriasis or other auto-immune disorders                                 | 498      |
| Celera Follow-up Set 2, <i>A. Begovich</i> <sup>2,3</sup> | No history of psoriasis                                                                | 427      |
| Collection of <i>D. Gladman</i>                           | No evidence of psoriasis, rheumatoid arthritis or other auto-immune disorders          | 217      |
| Collection of <i>J. Fisher</i> <sup>6-8</sup>             | No history of psoriasis                                                                | 486      |
| Collection of <i>A. Bowcock</i> <sup>4</sup> **           | Population controls; unknown psoriasis status                                          | 500      |
| Collection of <i>P. Rahman</i> <sup>9</sup>               | No history of psoriasis or other auto-immune disorder                                  | 358      |

\* Additional selection criteria for Michigan cases included a requirement of at least two psoriatic plaques or a single plaque occupying >1% of total body surface area outside scalp. Individuals that presented only palmoplantar psoriasis, inverse psoriasis or sebopsoriasis were excluded.

\*\* The discovery sample used here overlaps partially with the replication sample of Liu et al<sup>4</sup>. The replication sample used here is the discovery sample of Liu et al<sup>4</sup>. The genotype data used for our analyses was generated independently and is distinct from the genotype data in Liu et al.<sup>4</sup>

\*\*\* Previously unpublished sample collected at University of Toronto affiliated hospitals.

### **References for Supplementary Table 1**

1. Nair, R.P. et al. Polymorphisms of the IL12B and IL23R Genes Are Associated with Psoriasis. *J Invest Dermatol* (2008).
2. Cargill, M. et al. A large-scale genetic association study confirms IL12B and leads to the identification of IL23R as psoriasis-risk genes. *Am J Hum Genet* **80**, 273-90 (2007).
3. Chang, M. et al. Variants in the 5q31 cytokine gene cluster are associated with psoriasis. *Genes Immun* **9**, 176-81 (2008).
4. Liu, Y. et al. A genome-wide association study of psoriasis and psoriatic arthritis identifies new disease Loci. *PLoS Genet* **4**, e1000041 (2008).
5. Jenisch, S. et al. CARD15 mutations in patients with plaque-type psoriasis and psoriatic arthritis: lack of association. *Arch Dermatol Res* **297**, 409-11 (2006).
6. Mahe, E. et al. Physicians' response to a letter to confirm diagnosis in a genetic study of psoriasis. *Eur J Dermatol* **12**, 66-9 (2002).
7. Lesueur, F. et al. Confirmation of psoriasis susceptibility loci on chromosome 6p21 and 20p13 in French families. *J Invest Dermatol* **127**, 1403-9 (2007).
8. Lesueur, F. et al. ADAM33, a new candidate for psoriasis susceptibility. *PLoS ONE* **2**, e906 (2007).
9. Rahman, P. et al. Association between the interleukin-1 family gene cluster and psoriatic arthritis. *Arthritis Rheum* **54**, 2321-5 (2006).

### **Additional Notes on Supplementary Table 1**

Note that nearly all cases were collected in dermatology clinics and had their diagnosis confirmed by a dermatologist (except for a subset of the samples contributed by Dr. Rahman, which were diagnosed by a rheumatologist). A subset of controls for the follow-up sample (contributed by Drs. Bowcock and Weichenthal) were “population controls” and may include a small number of psoriasis cases. Since psoriasis is rare, we expect the impact on power to be negligible.

All cases and controls included in the study correspond to individuals who provided informed consent and reported their ancestry as “Caucasian” or “White, not Hispanic origin”.

**Supplementary Table 2 – Detailed association test results and genotype counts.**

The table provides detailed association test results including p-values and genotype counts in cases and controls for all successfully genotyped SNPs in each follow-up sample. A small number of SNPs failed genotyping or assay design in some follow-up samples (on average <2 SNPs failed per follow-up sample set) and, thus, their corresponding entries are marked as *NA* (not available) in the Table.

Supplementary Table 2

| Locus                                                                       | SNP                     | Chr | Pos         | Alleles<br>risk/non-risk | 1/1 <sup>a</sup> | Cases |      |       | Freq <sup>b</sup> | Controls |      |       | pvalue  | OR    |
|-----------------------------------------------------------------------------|-------------------------|-----|-------------|--------------------------|------------------|-------|------|-------|-------------------|----------|------|-------|---------|-------|
|                                                                             |                         |     |             |                          |                  | 1/2   | 2/2  | 1/1   |                   | 1/2      | 2/2  | Freq  |         |       |
| <b>GAIN samples (1359 cases, 1400 controls)</b>                             |                         |     |             |                          |                  |       |      |       |                   |          |      |       |         |       |
| HLA-C                                                                       | rs12191877              | 6   | 31,360,904  | T/C                      | 105              | 642   | 612  | 0.313 | 34                | 326      | 1040 | 0.141 | 3.9E-53 | 2.788 |
| IL12B                                                                       | rs2082412               | 5   | 158,650,367 | G/A                      | 973              | 344   | 20   | 0.856 | 862               | 461      | 56   | 0.792 | 5.5E-10 | 1.564 |
| TNIP1                                                                       | rs17728338              | 5   | 150,458,511 | A/G                      | 10               | 232   | 1117 | 0.093 | 3                 | 151      | 1246 | 0.056 | 2.0E-07 | 1.720 |
| IL13                                                                        | rs20541                 | 5   | 132,023,863 | G/A                      | 929              | 389   | 33   | 0.832 | 848               | 491      | 57   | 0.783 | 5.8E-06 | 1.366 |
| IL13                                                                        | rs848 <sup>c</sup>      | 5   | 132,024,398 | C/A                      | 933              | 393   | 33   | 0.831 | 841               | 501      | 58   | 0.780 | 1.4E-06 | 1.391 |
| TNFAIP3                                                                     | rs610604                | 6   | 138,241,110 | G/T                      | 181              | 652   | 524  | 0.374 | 132               | 625      | 641  | 0.318 | 1.4E-05 | 1.279 |
| IL23A,STA                                                                   | rs2066808 <sup>c</sup>  | 12  | 55,024,239  | A/G                      | 1246             | 111   | 2    | 0.958 | 1215              | 177      | 8    | 0.931 | 1.7E-05 | 1.676 |
| IL23A,STA                                                                   | rs2066807               | 12  | 55,026,949  | C/G                      | 1229             | 111   | 2    | 0.957 | 1194              | 177      | 8    | 0.930 | 1.5E-05 | 1.681 |
| IL23R                                                                       | rs2201841               | 1   | 67,466,790  | G/A                      | 158              | 635   | 566  | 0.350 | 117               | 565      | 717  | 0.286 | 2.9E-07 | 1.347 |
| TSC1                                                                        | rs1076160               | 9   | 134,765,855 | T/C                      | 378              | 654   | 323  | 0.520 | 301               | 693      | 404  | 0.463 | 2.2E-05 | 1.257 |
| IL1RN                                                                       | rs397211                | 2   | 113,608,612 | T/C                      | 694              | 557   | 104  | 0.718 | 634               | 625      | 139  | 0.677 | 1.0E-03 | 1.213 |
| SMARCA4                                                                     | rs12983316              | 19  | 10,975,352  | G/A                      | 39               | 421   | 880  | 0.186 | 24                | 348      | 1007 | 0.144 | 2.3E-05 | 1.365 |
| MAML2                                                                       | rs10765787              | 11  | 95,455,226  | T/C                      | 34               | 376   | 944  | 0.164 | 19                | 310      | 1070 | 0.124 | 2.9E-05 | 1.381 |
| CNTN5                                                                       | rs12807920              | 11  | 98,996,747  | C/T                      | 403              | 682   | 273  | 0.548 | 345               | 698      | 355  | 0.496 | 1.3E-04 | 1.229 |
| DYTN                                                                        | rs13425179              | 2   | 207,251,268 | G/A                      | 717              | 513   | 118  | 0.722 | 600               | 634      | 149  | 0.663 | 2.2E-06 | 1.321 |
| SESN1                                                                       | rs2273668               | 6   | 109,430,212 | G/T                      | 1100             | 247   | 11   | 0.901 | 1045              | 328      | 26   | 0.864 | 2.3E-05 | 1.430 |
| PRKRIP1                                                                     | rs10238421 <sup>c</sup> | 7   | 101,831,694 | A/G                      | 792              | 499   | 68   | 0.766 | 731               | 561      | 108  | 0.723 | 1.9E-04 | 1.260 |
| RGS6                                                                        | rs2239247               | 14  | 71,871,989  | A/G                      | 65               | 433   | 837  | 0.211 | 38                | 373      | 968  | 0.163 | 5.5E-06 | 1.374 |
| STK32A                                                                      | rs4705036               | 5   | 146,665,485 | T/C                      | 992              | 336   | 31   | 0.854 | 908               | 438      | 53   | 0.806 | 2.2E-06 | 1.407 |
| COL22A1                                                                     | rs7845922 <sup>c</sup>  | 8   | 140,467,714 | C/A                      | 138              | 593   | 628  | 0.320 | 87                | 558      | 755  | 0.261 | 1.8E-06 | 1.328 |
| PRKRIP1                                                                     | rs3988090               | 7   | 101,836,025 | A/G                      | 859              | 448   | 49   | 0.799 | 774               | 529      | 93   | 0.744 | 1.3E-06 | 1.366 |
| <b>University of Michigan follow-up samples (1642 cases, 1101 controls)</b> |                         |     |             |                          |                  |       |      |       |                   |          |      |       |         |       |
| HLA-C                                                                       | rs12191877              | 6   | 31,360,904  | T/C                      | 101              | 758   | 766  | 0.295 | 22                | 251      | 816  | 0.135 | 1.0E-42 | 2.676 |
| IL12B                                                                       | rs2082412               | 5   | 158,650,367 | G/A                      | 1177             | 403   | 39   | 0.851 | 684               | 355      | 58   | 0.785 | 3.2E-10 | 1.567 |
| TNIP1                                                                       | rs17728338              | 5   | 150,458,511 | A/G                      | 11               | 262   | 1361 | 0.087 | 4                 | 108      | 983  | 0.053 | 2.4E-06 | 1.702 |
| IL13                                                                        | rs20541                 | 5   | 132,023,863 | G/A                      | 1115             | 465   | 44   | 0.830 | 653               | 382      | 54   | 0.775 | 5.3E-07 | 1.415 |
| IL13                                                                        | rs848                   | 5   | 132,024,398 | C/A                      | 1105             | 472   | 45   | 0.827 | 656               | 387      | 57   | 0.772 | 6.5E-07 | 1.407 |
| TNFAIP3                                                                     | rs610604                | 6   | 138,241,110 | G/T                      | 205              | 757   | 659  | 0.360 | 108               | 481      | 512  | 0.317 | 0.00092 | 1.214 |
| IL23A,STA                                                                   | rs2066808               | 12  | 55,024,239  | A/G                      | 1472             | 151   | 5    | 0.951 | 947               | 139      | 7    | 0.930 | 0.0014  | 1.447 |
| IL23A,STA                                                                   | rs2066807               | 12  | 55,026,949  | C/G                      | 1480             | 145   | 4    | 0.953 | 965               | 125      | 8    | 0.936 | 0.0057  | 1.392 |
| IL23R                                                                       | rs2201841               | 1   | 67,466,790  | G/A                      | 167              | 724   | 735  | 0.325 | 93                | 454      | 551  | 0.291 | 0.0081  | 1.172 |
| TSC1                                                                        | rs1076160               | 9   | 134,765,855 | T/C                      | 384              | 817   | 427  | 0.487 | 237               | 532      | 316  | 0.464 | 0.094   | 1.098 |
| IL1RN                                                                       | rs397211                | 2   | 113,608,612 | T/C                      | 819              | 661   | 152  | 0.704 | 534               | 462      | 102  | 0.697 | 0.546   | 1.037 |
| SMARCA4                                                                     | rs12983316              | 19  | 10,975,352  | G/A                      | 41               | 428   | 1164 | 0.156 | 22                | 271      | 808  | 0.143 | 0.184   | 1.109 |
| MAML2                                                                       | rs10765787              | 11  | 95,455,226  | T/C                      | 33               | 388   | 1207 | 0.139 | 25                | 280      | 789  | 0.151 | 0.241   | 0.912 |
| CNTN5                                                                       | rs12807920              | 11  | 98,996,747  | C/T                      | 443              | 804   | 377  | 0.520 | 313               | 521      | 252  | 0.528 | 0.575   | 0.969 |
| DYTN                                                                        | rs13425179              | 2   | 207,251,268 | G/A                      | 761              | 674   | 173  | 0.683 | 555               | 439      | 100  | 0.708 | 0.049   | 0.888 |
| SESN1                                                                       | rs2273668               | 6   | 109,430,212 | G/T                      | 1260             | 337   | 30   | 0.878 | 836               | 247      | 18   | 0.871 | 0.475   | 1.061 |
| PRKRIP1                                                                     | rs10238421              | 7   | 101,831,694 | A/G                      | 931              | 577   | 93   | 0.762 | 555               | 350      | 38   | 0.774 | 0.312   | 0.933 |
| RGS6                                                                        | rs2239247               | 14  | 71,871,989  | A/G                      | 50               | 509   | 1075 | 0.186 | 40                | 314      | 743  | 0.180 | 0.526   | 1.046 |
| STK32A                                                                      | rs4705036               | 5   | 146,665,485 | T/C                      | 1122             | 454   | 49   | 0.830 | 764               | 295      | 28   | 0.839 | 0.416   | 0.941 |
| COL22A1                                                                     | rs7845922               | 8   | 140,467,714 | C/A                      | 125              | 613   | 891  | 0.265 | 70                | 463      | 557  | 0.277 | 0.340   | 0.942 |
| PRKRIP1                                                                     | rs3988090               | 7   | 101,836,025 | A/G                      | 949              | 587   | 94   | 0.762 | 638               | 403      | 45   | 0.773 | 0.359   | 0.942 |

Supplementary Table 2

| Locus                                                           | SNP        | Chr | Pos         | Alleles<br>risk/non-risk | Cases            |     |     |                   | Controls |     |     |       | pvalue  | OR    |
|-----------------------------------------------------------------|------------|-----|-------------|--------------------------|------------------|-----|-----|-------------------|----------|-----|-----|-------|---------|-------|
|                                                                 |            |     |             |                          | 1/1 <sup>a</sup> | 1/2 | 2/2 | Freq <sup>b</sup> | 1/1      | 1/2 | 2/2 | Freq  |         |       |
| <b>Newfoundland follow-up samples (368 cases, 358 controls)</b> |            |     |             |                          |                  |     |     |                   |          |     |     |       |         |       |
| HLA-C                                                           | rs12191877 | 6   | 31,360,904  | T/C                      | 8                | 122 | 236 | 0.189             | 4        | 74  | 276 | 0.116 | 1.3E-04 | 1.774 |
| IL12B                                                           | rs2082412  | 5   | 158,650,367 | G/A                      | 264              | 89  | 13  | 0.843             | 235      | 107 | 13  | 0.813 | 0.128   | 1.237 |
| TNIP1                                                           | rs17728338 | 5   | 150,458,511 | A/G                      | 3                | 67  | 297 | 0.099             | 4        | 40  | 311 | 0.068 | 0.029   | 1.523 |
| IL13                                                            | rs20541    | 5   | 132,023,863 | G/A                      | 251              | 105 | 11  | 0.827             | 227      | 115 | 13  | 0.801 | 0.212   | 1.184 |
| IL13                                                            | rs848      | 5   | 132,024,398 | C/A                      | 236              | 103 | 11  | 0.821             | 216      | 115 | 13  | 0.795 | 0.212   | 1.186 |
| TNFAIP3                                                         | rs610604   | 6   | 138,241,110 | G/T                      | 52               | 149 | 166 | 0.345             | 39       | 155 | 162 | 0.327 | 0.483   | 1.081 |
| IL23A,STA                                                       | rs2066808  | 12  | 55,024,239  | A/G                      | 328              | 38  | 1   | 0.946             | 304      | 50  | 0   | 0.929 | 0.206   | 1.318 |
| IL23A,STA                                                       | rs2066807  | 12  | 55,026,949  | C/G                      | 328              | 38  | 1   | 0.946             | 307      | 48  | 0   | 0.932 | 0.298   | 1.258 |
| IL23R                                                           | rs2201841  | 1   | 67,466,790  | G/A                      | 33               | 154 | 163 | 0.314             | 44       | 138 | 162 | 0.328 | 0.571   | 0.937 |
| TSC1                                                            | rs1076160  | 9   | 134,765,855 | T/C                      | 85               | 187 | 94  | 0.488             | 92       | 169 | 95  | 0.496 | 0.759   | 0.968 |
| IL1RN                                                           | rs397211   | 2   | 113,608,612 | T/C                      | 180              | 155 | 32  | 0.702             | 158      | 166 | 31  | 0.679 | 0.350   | 1.112 |
| SMARCA4                                                         | rs12983316 | 19  | 10,975,352  | G/A                      | 16               | 91  | 242 | 0.176             | 10       | 79  | 256 | 0.143 | 0.096   | 1.277 |
| MAML2                                                           | rs10765787 | 11  | 95,455,226  | T/C                      | 11               | 95  | 261 | 0.159             | 7        | 96  | 252 | 0.155 | 0.815   | 1.034 |
| CNTN5                                                           | rs12807920 | 11  | 98,996,747  | C/T                      | 86               | 196 | 83  | 0.504             | 98       | 173 | 84  | 0.520 | 0.554   | 0.939 |
| DYTN                                                            | rs13425179 | 2   | 207,251,268 | G/A                      | 178              | 134 | 42  | 0.692             | 163      | 153 | 38  | 0.677 | 0.529   | 1.075 |
| SESN1                                                           | rs2273668  | 6   | 109,430,212 | G/T                      | 274              | 87  | 5   | 0.867             | 281      | 68  | 6   | 0.887 | 0.251   | 0.831 |
| PRKRIP1                                                         | rs10238421 | 7   | 101,831,694 | A/G                      | NA               | NA  | NA  | NA                | NA       | NA  | NA  | NA    | NA      | NA    |
| RGS6                                                            | rs2239247  | 14  | 71,871,989  | A/G                      | 12               | 100 | 255 | 0.169             | 8        | 97  | 249 | 0.160 | 0.633   | 1.070 |
| STK32A                                                          | rs4705036  | 5   | 146,665,485 | T/C                      | 259              | 87  | 12  | 0.845             | 253      | 90  | 10  | 0.844 | 0.968   | 1.006 |
| COL22A1                                                         | rs7845922  | 8   | 140,467,714 | C/A                      | 30               | 159 | 178 | 0.298             | 32       | 136 | 187 | 0.282 | 0.485   | 1.084 |
| PRKRIP1                                                         | rs3988090  | 7   | 101,836,025 | A/G                      | 227              | 111 | 11  | 0.809             | 209      | 127 | 7   | 0.794 | 0.484   | 1.099 |
| <b>Toronto follow-up samples (691 cases, 217 controls)</b>      |            |     |             |                          |                  |     |     |                   |          |     |     |       |         |       |
| HLA-C                                                           | rs12191877 | 6   | 31,360,904  | T/C                      | 52               | 250 | 381 | 0.259             | 4        | 55  | 158 | 0.145 | 9.4E-07 | 2.060 |
| IL12B                                                           | rs2082412  | 5   | 158,650,367 | G/A                      | 491              | 176 | 17  | 0.846             | 148      | 53  | 16  | 0.804 | 0.038   | 1.343 |
| TNIP1                                                           | rs17728338 | 5   | 150,458,511 | A/G                      | 8                | 126 | 551 | 0.104             | 0        | 32  | 185 | 0.074 | 0.066   | 1.453 |
| IL13                                                            | rs20541    | 5   | 132,023,863 | G/A                      | 463              | 200 | 22  | 0.822             | 129      | 74  | 14  | 0.765 | 0.0087  | 1.418 |
| IL13                                                            | rs848      | 5   | 132,024,398 | C/A                      | 453              | 199 | 24  | 0.817             | 127      | 71  | 15  | 0.763 | 0.014   | 1.390 |
| TNFAIP3                                                         | rs610604   | 6   | 138,241,110 | G/T                      | 100              | 318 | 268 | 0.378             | 23       | 106 | 88  | 0.350 | 0.304   | 1.125 |
| IL23A,STA                                                       | rs2066808  | 12  | 55,024,239  | A/G                      | 620              | 65  | 1   | 0.951             | 190      | 25  | 2   | 0.933 | 0.145   | 1.395 |
| IL23A,STA                                                       | rs2066807  | 12  | 55,026,949  | C/G                      | 628              | 60  | 1   | 0.955             | 194      | 21  | 2   | 0.942 | 0.284   | 1.297 |
| IL23R                                                           | rs2201841  | 1   | 67,466,790  | G/A                      | 83               | 289 | 308 | 0.335             | 23       | 94  | 98  | 0.326 | 0.730   | 1.041 |
| TSC1                                                            | rs1076160  | 9   | 134,765,855 | T/C                      | 188              | 336 | 162 | 0.519             | 52       | 102 | 62  | 0.477 | 0.127   | 1.184 |
| IL1RN                                                           | rs397211   | 2   | 113,608,612 | T/C                      | 357              | 269 | 60  | 0.716             | 102      | 87  | 28  | 0.671 | 0.067   | 1.242 |
| SMARCA4                                                         | rs12983316 | 19  | 10,975,352  | G/A                      | 20               | 184 | 478 | 0.164             | 5        | 59  | 151 | 0.160 | 0.854   | 1.028 |
| MAML2                                                           | rs10765787 | 11  | 95,455,226  | T/C                      | 14               | 198 | 472 | 0.165             | 5        | 49  | 163 | 0.136 | 0.146   | 1.258 |
| CNTN5                                                           | rs12807920 | 11  | 98,996,747  | C/T                      | 193              | 329 | 163 | 0.522             | 56       | 109 | 52  | 0.509 | 0.645   | 1.052 |
| DYTN                                                            | rs13425179 | 2   | 207,251,268 | G/A                      | 326              | 267 | 61  | 0.703             | 113      | 73  | 26  | 0.705 | 0.919   | 0.988 |
| SESN1                                                           | rs2273668  | 6   | 109,430,212 | G/T                      | 551              | 129 | 5   | 0.899             | 169      | 45  | 3   | 0.882 | 0.342   | 1.179 |
| PRKRIP1                                                         | rs10238421 | 7   | 101,831,694 | A/G                      | NA               | NA  | NA  | NA                | NA       | NA  | NA  | NA    | NA      | NA    |
| RGS6                                                            | rs2239247  | 14  | 71,871,989  | A/G                      | 22               | 198 | 467 | 0.176             | 8        | 72  | 137 | 0.203 | 0.210   | 0.841 |
| STK32A                                                          | rs4705036  | 5   | 146,665,485 | T/C                      | 494              | 160 | 18  | 0.854             | 148      | 59  | 9   | 0.822 | 0.104   | 1.270 |
| COL22A1                                                         | rs7845922  | 8   | 140,467,714 | C/A                      | 52               | 273 | 361 | 0.275             | 13       | 90  | 113 | 0.269 | 0.799   | 1.032 |
| PRKRIP1                                                         | rs3988090  | 7   | 101,836,025 | A/G                      | 407              | 233 | 39  | 0.771             | 120      | 81  | 13  | 0.750 | 0.371   | 1.122 |

Supplementary Table 2

| Locus                                                                    | SNP        | Chr | Pos         | Alleles<br>risk/non-risk | 1/1 <sup>a</sup> | Cases |     |                   | Controls |     |      | pvalue | OR      |       |
|--------------------------------------------------------------------------|------------|-----|-------------|--------------------------|------------------|-------|-----|-------------------|----------|-----|------|--------|---------|-------|
|                                                                          |            |     |             |                          |                  | 1/2   | 2/2 | Freq <sup>b</sup> | 1/1      | 1/2 | 2/2  |        |         | Freq  |
| <b>Kiel follow-up samples (718 cases, 1464 controls)</b>                 |            |     |             |                          |                  |       |     |                   |          |     |      |        |         |       |
| HLA-C                                                                    | rs12191877 | 6   | 31,360,904  | T/C                      | 69               | 356   | 286 | 0.347             | 30       | 353 | 1057 | 0.143  | 1.0E-53 | 3.180 |
| IL12B                                                                    | rs2082412  | 5   | 158,650,367 | G/A                      | 519              | 176   | 16  | 0.854             | 945      | 441 | 53   | 0.810  | 3.8E-04 | 1.370 |
| TNIP1                                                                    | rs17728338 | 5   | 150,458,511 | A/G                      | 4                | 90    | 619 | 0.069             | 3        | 130 | 1312 | 0.047  | 0.0031  | 1.494 |
| IL13                                                                     | rs20541    | 5   | 132,023,863 | G/A                      | 462              | 220   | 25  | 0.809             | 866      | 502 | 63   | 0.781  | 0.031   | 1.191 |
| IL13                                                                     | rs848      | 5   | 132,024,398 | C/A                      | 464              | 223   | 24  | 0.809             | 875      | 498 | 67   | 0.781  | 0.029   | 1.194 |
| TNFAIP3                                                                  | rs610604   | 6   | 138,241,110 | G/T                      | 85               | 333   | 286 | 0.357             | 157      | 613 | 668  | 0.322  | 0.023   | 1.169 |
| IL23A,STA                                                                | rs2066808  | 12  | 55,024,239  | A/G                      | 635              | 72    | 1   | 0.948             | 1256     | 185 | 12   | 0.928  | 0.014   | 1.405 |
| IL23A,STA                                                                | rs2066807  | 12  | 55,026,949  | C/G                      | 638              | 69    | 1   | 0.950             | 1238     | 181 | 10   | 0.930  | 0.011   | 1.433 |
| IL23R                                                                    | rs2201841  | 1   | 67,466,790  | G/A                      | 71               | 301   | 337 | 0.312             | 122      | 559 | 772  | 0.276  | 0.014   | 1.190 |
| TSC1                                                                     | rs1076160  | 9   | 134,765,855 | T/C                      | 163              | 349   | 193 | 0.479             | 306      | 714 | 412  | 0.463  | 0.332   | 1.065 |
| IL1RN                                                                    | rs397211   | 2   | 113,608,612 | T/C                      | 362              | 282   | 57  | 0.718             | 689      | 619 | 133  | 0.693  | 0.099   | 1.126 |
| SMARCA4                                                                  | rs12983316 | 19  | 10,975,352  | G/A                      | 14               | 188   | 501 | 0.154             | 46       | 373 | 1020 | 0.162  | 0.504   | 0.942 |
| MAML2                                                                    | rs10765787 | 11  | 95,455,226  | T/C                      | 14               | 166   | 528 | 0.137             | 37       | 357 | 1057 | 0.149  | 0.313   | 0.910 |
| CNTN5                                                                    | rs12807920 | 11  | 98,996,747  | C/T                      | 186              | 362   | 164 | 0.515             | 442      | 700 | 296  | 0.551  | 0.029   | 0.868 |
| DYTN                                                                     | rs13425179 | 2   | 207,251,268 | G/A                      | 325              | 309   | 77  | 0.674             | 673      | 601 | 175  | 0.672  | 0.866   | 1.012 |
| SESN1                                                                    | rs2273668  | 6   | 109,430,212 | G/T                      | 566              | 137   | 6   | 0.895             | 1094     | 321 | 32   | 0.867  | 0.0088  | 1.307 |
| PRKRIP1                                                                  | rs10238421 | 7   | 101,831,694 | A/G                      | NA               | NA    | NA  | NA                | NA       | NA  | NA   | NA     | NA      | NA    |
| RGS6                                                                     | rs2239247  | 14  | 71,871,989  | A/G                      | 20               | 227   | 461 | 0.189             | 37       | 436 | 955  | 0.179  | 0.426   | 1.069 |
| STK32A                                                                   | rs4705036  | 5   | 146,665,485 | T/C                      | 461              | 231   | 16  | 0.814             | 939      | 447 | 59   | 0.804  | 0.445   | 1.065 |
| COL22A1                                                                  | rs7845922  | 8   | 140,467,714 | C/A                      | 51               | 262   | 396 | 0.257             | 81       | 559 | 797  | 0.251  | 0.679   | 1.031 |
| PRKRIP1                                                                  | rs3988090  | 7   | 101,836,025 | A/G                      | NA               | NA    | NA  | NA                | NA       | NA  | NA   | NA     | NA      | NA    |
| <b>Washington University follow-up samples (302 cases, 500 controls)</b> |            |     |             |                          |                  |       |     |                   |          |     |      |        |         |       |
| HLA-C                                                                    | rs12191877 | 6   | 31,360,904  | T/C                      | 32               | 126   | 140 | 0.319             | 13       | 104 | 376  | 0.132  | 3.0E-19 | 3.081 |
| IL12B                                                                    | rs2082412  | 5   | 158,650,367 | G/A                      | 220              | 72    | 8   | 0.853             | 325      | 150 | 18   | 0.811  | 0.032   | 1.353 |
| TNIP1                                                                    | rs17728338 | 5   | 150,458,511 | A/G                      | 1                | 53    | 247 | 0.091             | 1        | 42  | 453  | 0.044  | 1.6E-04 | 2.166 |
| IL13                                                                     | rs20541    | 5   | 132,023,863 | G/A                      | 204              | 85    | 12  | 0.819             | 323      | 160 | 12   | 0.814  | 0.811   | 1.033 |
| IL13                                                                     | rs848      | 5   | 132,024,398 | C/A                      | 199              | 81    | 12  | 0.820             | 316      | 147 | 14   | 0.817  | 0.857   | 1.025 |
| TNFAIP3                                                                  | rs610604   | 6   | 138,241,110 | G/T                      | 44               | 126   | 130 | 0.357             | 46       | 205 | 244  | 0.300  | 0.019   | 1.294 |
| IL23A,STA                                                                | rs2066808  | 12  | 55,024,239  | A/G                      | 276              | 24    | 0   | 0.960             | 425      | 68  | 2    | 0.927  | 0.0079  | 1.882 |
| IL23A,STA                                                                | rs2066807  | 12  | 55,026,949  | C/G                      | 280              | 21    | 0   | 0.965             | 430      | 67  | 1    | 0.931  | 0.0039  | 2.059 |
| IL23R                                                                    | rs2201841  | 1   | 67,466,790  | G/A                      | 31               | 137   | 132 | 0.332             | 49       | 205 | 239  | 0.307  | 0.312   | 1.119 |
| TSC1                                                                     | rs1076160  | 9   | 134,765,855 | T/C                      | 83               | 149   | 68  | 0.525             | 131      | 259 | 107  | 0.524  | 0.974   | 1.003 |
| IL1RN                                                                    | rs397211   | 2   | 113,608,612 | T/C                      | 146              | 151   | 2   | 0.741             | 231      | 251 | 5    | 0.732  | 0.702   | 1.046 |
| SMARCA4                                                                  | rs12983316 | 19  | 10,975,352  | G/A                      | 6                | 90    | 204 | 0.170             | 11       | 113 | 373  | 0.136  | 0.063   | 1.303 |
| MAML2                                                                    | rs10765787 | 11  | 95,455,226  | T/C                      | 6                | 70    | 222 | 0.138             | 16       | 144 | 335  | 0.178  | 0.036   | 0.738 |
| CNTN5                                                                    | rs12807920 | 11  | 98,996,747  | C/T                      | 89               | 147   | 61  | 0.547             | 142      | 236 | 111  | 0.532  | 0.552   | 1.064 |
| DYTN                                                                     | rs13425179 | 2   | 207,251,268 | G/A                      | 141              | 129   | 29  | 0.687             | 244      | 198 | 48   | 0.700  | 0.595   | 0.942 |
| SESN1                                                                    | rs2273668  | 6   | 109,430,212 | G/T                      | 229              | 64    | 5   | 0.876             | 379      | 108 | 6    | 0.878  | 0.885   | 0.977 |
| PRKRIP1                                                                  | rs10238421 | 7   | 101,831,694 | A/G                      | NA               | NA    | NA  | NA                | NA       | NA  | NA   | NA     | NA      | NA    |
| RGS6                                                                     | rs2239247  | 14  | 71,871,989  | A/G                      | NA               | NA    | NA  | NA                | NA       | NA  | NA   | NA     | NA      | NA    |
| STK32A                                                                   | rs4705036  | 5   | 146,665,485 | T/C                      | NA               | NA    | NA  | NA                | NA       | NA  | NA   | NA     | NA      | NA    |
| COL22A1                                                                  | rs7845922  | 8   | 140,467,714 | C/A                      | 29               | 101   | 170 | 0.265             | 35       | 196 | 261  | 0.270  | 0.817   | 0.973 |
| PRKRIP1                                                                  | rs3988090  | 7   | 101,836,025 | A/G                      | NA               | NA    | NA  | NA                | NA       | NA  | NA   | NA     | NA      | NA    |



Supplementary Table 2

| Locus                                                                 | SNP        | Chr | Pos         | Alleles<br>risk/non-risk | 1/1 <sup>a</sup> | Cases |     |                   | Controls |     |     | pvalue | OR      |       |
|-----------------------------------------------------------------------|------------|-----|-------------|--------------------------|------------------|-------|-----|-------------------|----------|-----|-----|--------|---------|-------|
|                                                                       |            |     |             |                          |                  | 1/2   | 2/2 | Freq <sup>b</sup> | 1/1      | 1/2 | 2/2 |        |         | Freq  |
| <b><sup>d</sup>France follow-up samples (346 cases, 486 controls)</b> |            |     |             |                          |                  |       |     |                   |          |     |     |        |         |       |
| HLA-C                                                                 | rs12191877 | 6   | 31,360,904  | T/C                      | 38               | 199   | 105 | 0.402             | 21       | 175 | 283 | 0.227  | 5.3E-13 | 2.296 |
| IL12B                                                                 | rs2082412  | 5   | 158,650,367 | G/A                      | 234              | 99    | 9   | 0.829             | 308      | 156 | 20  | 0.798  | 0.294   | 1.230 |
| TNIP1                                                                 | rs17728338 | 5   | 150,458,511 | A/G                      | 2                | 51    | 279 | 0.083             | 1        | 48  | 413 | 0.054  | 0.035   | 1.578 |
| IL13                                                                  | rs20541    | 5   | 132,023,863 | G/A                      | 244              | 75    | 18  | 0.835             | 304      | 156 | 16  | 0.803  | 0.124   | 1.248 |
| IL13                                                                  | rs848      | 5   | 132,024,398 | C/A                      | 242              | 77    | 19  | 0.830             | 302      | 158 | 16  | 0.800  | 0.121   | 1.217 |
| TNFAIP3                                                               | rs610604   | 6   | 138,241,110 | G/T                      | 51               | 155   | 136 | 0.376             | 56       | 212 | 214 | 0.336  | 0.186   | 1.189 |
| IL23A,STA                                                             | rs2066808  | 12  | 55,024,239  | A/G                      | 313              | 29    | 0   | 0.958             | 447      | 35  | 0   | 0.964  | 0.877   | 0.851 |
| IL23A,STA                                                             | rs2066807  | 12  | 55,026,949  | C/G                      | 322              | 21    | 0   | 0.969             | 452      | 31  | 0   | 0.968  | 0.383   | 1.051 |
| IL23R                                                                 | rs2201841  | 1   | 67,466,790  | G/A                      | 35               | 144   | 163 | 0.313             | 38       | 187 | 257 | 0.273  | 0.521   | 1.214 |
| TSC1                                                                  | rs1076160  | 9   | 134,765,855 | T/C                      | 78               | 180   | 84  | 0.491             | 121      | 231 | 127 | 0.494  | 0.943   | 0.990 |
| IL1RN                                                                 | rs397211   | 2   | 113,608,612 | T/C                      | NA               | NA    | NA  | NA                | NA       | NA  | NA  | NA     | NA      | NA    |
| SMARCA4                                                               | rs12983316 | 19  | 10,975,352  | G/A                      | 8                | 73    | 264 | 0.129             | 9        | 95  | 373 | 0.118  | 0.448   | 1.103 |
| MAML2                                                                 | rs10765787 | 11  | 95,455,226  | T/C                      | 6                | 65    | 268 | 0.114             | 8        | 123 | 341 | 0.147  | 0.137   | 0.742 |
| CNTN5                                                                 | rs12807920 | 11  | 98,996,747  | C/T                      | 115              | 155   | 73  | 0.561             | 164      | 226 | 93  | 0.573  | 0.864   | 0.951 |
| DYTN                                                                  | rs13425179 | 2   | 207,251,268 | G/A                      | 160              | 145   | 34  | 0.686             | 229      | 201 | 50  | 0.686  | 0.804   | 0.997 |
| SESN1                                                                 | rs2273668  | 6   | 109,430,212 | G/T                      | 262              | 76    | 4   | 0.877             | 358      | 109 | 10  | 0.865  | 0.288   | 1.117 |
| PRKRIP1                                                               | rs10238421 | 7   | 101,831,694 | A/G                      | 190              | 132   | 15  | 0.760             | 285      | 176 | 17  | 0.780  | 0.426   | 0.890 |
| RGS6                                                                  | rs2239247  | 14  | 71,871,989  | A/G                      | 17               | 97    | 227 | 0.192             | 14       | 152 | 319 | 0.186  | 0.775   | 1.043 |
| STK32A                                                                | rs4705036  | 5   | 146,665,485 | T/C                      | 224              | 104   | 8   | 0.821             | 316      | 144 | 20  | 0.808  | 0.924   | 1.091 |
| COL22A1                                                               | rs7845922  | 8   | 140,467,714 | C/A                      | 26               | 137   | 178 | 0.277             | 34       | 201 | 247 | 0.279  | 0.883   | 0.991 |
| PRKRIP1                                                               | rs3988090  | 7   | 101,836,025 | A/G                      | NA               | NA    | NA  | NA                | NA       | NA  | NA  | NA     | NA      | NA    |
| <b>Celera Set 1 follow-up samples (498 cases, 498 controls)</b>       |            |     |             |                          |                  |       |     |                   |          |     |     |        |         |       |
| HLA-C                                                                 | rs12191877 | 6   | 31,360,904  | T/C                      | 32               | 219   | 239 | 0.289             | 10       | 120 | 360 | 0.143  | 4.1E-15 | 2.436 |
| IL12B                                                                 | rs2082412  | 5   | 158,650,367 | G/A                      | 364              | 116   | 12  | 0.858             | 294      | 173 | 22  | 0.778  | 4.9E-06 | 1.719 |
| TNIP1                                                                 | rs17728338 | 5   | 150,458,511 | A/G                      | 1                | 75    | 417 | 0.078             | 2        | 44  | 445 | 0.049  | 0.0079  | 1.648 |
| IL13                                                                  | rs20541    | 5   | 132,023,863 | G/A                      | 339              | 142   | 12  | 0.832             | 312      | 171 | 12  | 0.803  | 0.100   | 1.212 |
| IL13                                                                  | rs848      | 5   | 132,024,398 | C/A                      | 339              | 142   | 12  | 0.832             | 308      | 171 | 13  | 0.800  | 0.068   | 1.237 |
| TNFAIP3                                                               | rs610604   | 6   | 138,241,110 | G/T                      | 51               | 230   | 211 | 0.337             | 62       | 203 | 226 | 0.333  | 0.836   | 1.020 |
| IL23A,STA                                                             | rs2066808  | 12  | 55,024,239  | A/G                      | 420              | 71    | 2   | 0.924             | 420      | 68  | 3   | 0.925  | 0.953   | 0.990 |
| IL23A,STA                                                             | rs2066807  | 12  | 55,026,949  | C/G                      | 424              | 67    | 2   | 0.928             | 421      | 65  | 3   | 0.927  | 0.960   | 1.009 |
| IL23R                                                                 | rs2201841  | 1   | 67,466,790  | G/A                      | 63               | 194   | 235 | 0.325             | 49       | 207 | 236 | 0.310  | 0.468   | 1.073 |
| TSC1                                                                  | rs1076160  | 9   | 134,765,855 | T/C                      | 118              | 258   | 117 | 0.501             | 98       | 255 | 138 | 0.459  | 0.064   | 1.182 |
| IL1RN                                                                 | rs397211   | 2   | 113,608,612 | T/C                      | 235              | 202   | 56  | 0.682             | 242      | 198 | 51  | 0.695  | 0.535   | 0.941 |
| SMARCA4                                                               | rs12983316 | 19  | 10,975,352  | G/A                      | 14               | 123   | 355 | 0.153             | 13       | 111 | 367 | 0.140  | 0.382   | 1.118 |
| MAML2                                                                 | rs10765787 | 11  | 95,455,226  | T/C                      | 7                | 127   | 359 | 0.143             | 10       | 146 | 335 | 0.169  | 0.111   | 0.820 |
| CNTN5                                                                 | rs12807920 | 11  | 98,996,747  | C/T                      | 144              | 218   | 131 | 0.513             | 140      | 248 | 102 | 0.539  | 0.256   | 0.902 |
| DYTN                                                                  | rs13425179 | 2   | 207,251,268 | G/A                      | 229              | 214   | 49  | 0.683             | 249      | 206 | 34  | 0.720  | 0.074   | 0.838 |
| SESN1                                                                 | rs2273668  | 6   | 109,430,212 | G/T                      | 386              | 98    | 8   | 0.884             | 380      | 105 | 4   | 0.884  | 0.983   | 0.997 |
| PRKRIP1                                                               | rs10238421 | 7   | 101,831,694 | A/G                      | NA               | NA    | NA  | NA                | NA       | NA  | NA  | NA     | NA      | NA    |
| RGS6                                                                  | rs2239247  | 14  | 71,871,989  | A/G                      | 23               | 145   | 325 | 0.194             | 13       | 156 | 321 | 0.186  | 0.651   | 1.053 |
| STK32A                                                                | rs4705036  | 5   | 146,665,485 | T/C                      | 329              | 149   | 14  | 0.820             | 340      | 137 | 14  | 0.832  | 0.488   | 0.921 |
| COL22A1                                                               | rs7845922  | 8   | 140,467,714 | C/A                      | 29               | 213   | 251 | 0.275             | 39       | 188 | 263 | 0.271  | 0.865   | 1.017 |
| PRKRIP1                                                               | rs3988090  | 7   | 101,836,025 | A/G                      | 285              | 182   | 26  | 0.763             | 295      | 161 | 31  | 0.771  | 0.661   | 0.954 |

Supplementary Table 2

| Locus                                                           | SNP        | Chr | Pos         | Alleles<br>risk/non-risk | 1/1 <sup>a</sup> | Cases |     |                   | 1/1 | Controls |     |       | pvalue  | OR    |
|-----------------------------------------------------------------|------------|-----|-------------|--------------------------|------------------|-------|-----|-------------------|-----|----------|-----|-------|---------|-------|
|                                                                 |            |     |             |                          |                  | 1/2   | 2/2 | Freq <sup>b</sup> |     | 1/2      | 2/2 | Freq  |         |       |
| <b>Celera Set 2 follow-up samples (483 cases, 427 controls)</b> |            |     |             |                          |                  |       |     |                   |     |          |     |       |         |       |
| HLA-C                                                           | rs12191877 | 6   | 31,360,904  | T/C                      | 47               | 220   | 214 | 0.326             | 12  | 100      | 313 | 0.146 | 3.3E-19 | 2.837 |
| IL12B                                                           | rs2082412  | 5   | 158,650,367 | G/A                      | 336              | 130   | 15  | 0.834             | 258 | 153      | 15  | 0.785 | 0.0085  | 1.371 |
| TNIP1                                                           | rs17728338 | 5   | 150,458,511 | A/G                      | 3                | 80    | 397 | 0.090             | 2   | 59       | 365 | 0.074 | 0.226   | 1.232 |
| IL13                                                            | rs20541    | 5   | 132,023,863 | G/A                      | 343              | 131   | 8   | 0.848             | 273 | 142      | 11  | 0.808 | 0.024   | 1.325 |
| IL13                                                            | rs848      | 5   | 132,024,398 | C/A                      | 336              | 138   | 8   | 0.840             | 269 | 144      | 13  | 0.800 | 0.027   | 1.311 |
| TNFAIP3                                                         | rs610604   | 6   | 138,241,110 | G/T                      | 67               | 218   | 196 | 0.366             | 42  | 164      | 220 | 0.291 | 0.001   | 1.405 |
| IL23A,STA                                                       | rs2066808  | 12  | 55,024,239  | A/G                      | 424              | 57    | 0   | 0.941             | 367 | 52       | 2   | 0.933 | 0.526   | 1.131 |
| IL23A,STA                                                       | rs2066807  | 12  | 55,026,949  | C/G                      | 429              | 52    | 0   | 0.946             | 376 | 50       | 0   | 0.941 | 0.669   | 1.091 |
| IL23R                                                           | rs2201841  | 1   | 67,466,790  | G/A                      | 61               | 209   | 212 | 0.343             | 44  | 184      | 198 | 0.319 | 0.276   | 1.115 |
| TSC1                                                            | rs1076160  | 9   | 134,765,855 | T/C                      | 124              | 243   | 114 | 0.510             | 100 | 199      | 126 | 0.469 | 0.082   | 1.178 |
| IL1RN                                                           | rs397211   | 2   | 113,608,612 | T/C                      | 239              | 210   | 33  | 0.714             | 197 | 190      | 37  | 0.689 | 0.245   | 1.127 |
| SMARCA4                                                         | rs12983316 | 19  | 10,975,352  | G/A                      | 14               | 139   | 329 | 0.173             | 12  | 107      | 307 | 0.154 | 0.263   | 1.153 |
| MAML2                                                           | rs10765787 | 11  | 95,455,226  | T/C                      | 10               | 126   | 345 | 0.152             | 6   | 124      | 296 | 0.160 | 0.645   | 0.942 |
| CNTN5                                                           | rs12807920 | 11  | 98,996,747  | C/T                      | 120              | 245   | 117 | 0.503             | 109 | 223      | 94  | 0.518 | 0.538   | 0.944 |
| DYTN                                                            | rs13425179 | 2   | 207,251,268 | G/A                      | 239              | 200   | 42  | 0.705             | 214 | 178      | 33  | 0.713 | 0.703   | 0.961 |
| SESN1                                                           | rs2273668  | 6   | 109,430,212 | G/T                      | 363              | 112   | 6   | 0.871             | 330 | 93       | 3   | 0.884 | 0.411   | 0.889 |
| PRKRIP1                                                         | rs10238421 | 7   | 101,831,694 | A/G                      | NA               | NA    | NA  | NA                | NA  | NA       | NA  | NA    | NA      | NA    |
| RGS6                                                            | rs2239247  | 14  | 71,871,989  | A/G                      | 15               | 135   | 330 | 0.172             | 20  | 107      | 298 | 0.173 | 0.952   | 0.993 |
| STK32A                                                          | rs4705036  | 5   | 146,665,485 | T/C                      | 333              | 130   | 15  | 0.833             | 290 | 123      | 12  | 0.827 | 0.753   | 1.040 |
| COL22A1                                                         | rs7845922  | 8   | 140,467,714 | C/A                      | 39               | 203   | 239 | 0.292             | 29  | 169      | 228 | 0.266 | 0.224   | 1.136 |
| PRKRIP1                                                         | rs3988090  | 7   | 101,836,025 | A/G                      | 291              | 160   | 28  | 0.775             | 247 | 159      | 20  | 0.766 | 0.682   | 1.047 |

## Notes:

a. "1" stands for the risk allele and "2" stands for the non-risk allele.

b. the frequency of the risk allele.

c. SNPs were not originally genotyped in the GAIN study, but instead were imputed using MACH. The most likely genotypes were used to calculate the genotype counts for these imputed SNPs.

d. France follow-up samples are family-based data. The genotype counts were calculated ignoring the family structure, while the association tests were performed taking the family structure into account.

**Supplementary Table 3. Results of model building using forward selection with imputed and genotyped SNPs in the vicinity of replicated hits.** For each locus, the table lists the selected SNP for each round of model fitting, the evidence for association with the selected SNP (in a logistic regression based analysis that included SNPs selected in previous rounds as covariates) and the odds ratio for association. The  $r^2$  between each SNP and the SNP with confirmed association for each locus is also listed. Note that we preferentially selected genotyped SNPs for follow up, but the forward selection procedure often points to an imputed SNP that exhibits somewhat stronger association. We analyzed imputed SNPs, rather than just genotyped SNPs, because a single (untyped) associated SNP could result in strong association signals for multiple SNPs.

|                                                                                                       | SNP               | Position    | p-value after adjustment for<br>higher ranked SNPs |                     | SNPs<br>Tested | Odds<br>Ratio | $r^2$<br>(w/replicated SNP) |
|-------------------------------------------------------------------------------------------------------|-------------------|-------------|----------------------------------------------------|---------------------|----------------|---------------|-----------------------------|
|                                                                                                       |                   |             | w/o Sidak correction                               | w/ Sidak correction |                |               |                             |
| <b>HLA-C (models fitted including all SNPs within 4 Mb of replicated association at rs12191877)</b>   |                   |             |                                                    |                     |                |               |                             |
| Round 1                                                                                               | <b>rs12204500</b> | 31,184,375  | $8 \times 10^{-57}$                                | $9 \times 10^{-53}$ | 12,150         | 3.37          | 0.64                        |
| Round 2                                                                                               | <b>rs13191343</b> | 31,349,087  | $2 \times 10^{-10}$                                | $3 \times 10^{-6}$  | 12,149         | 1.78          | 0.85                        |
| Round 3                                                                                               | <b>rs2022544</b>  | 32,428,981  | $1 \times 10^{-7}$                                 | $1 \times 10^{-3}$  | 12,148         | 1.58          | <0.01                       |
| Stop                                                                                                  | rs2516514         | 31,555,114  | $2 \times 10^{-5}$                                 | 0.18                | 12,147         | 1.34          | 0.12                        |
| <b>IL12B (models fitted including all SNPs within 200 Kb of replicated association at rs2082412)</b>  |                   |             |                                                    |                     |                |               |                             |
| Round 1                                                                                               | <b>rs3212220</b>  | 158,686,773 | $1 \times 10^{-10}$                                | $4 \times 10^{-8}$  | 378            | 1.59          | 1.00                        |
| Round 2                                                                                               | <b>rs10059288</b> | 158,791,476 | $6 \times 10^{-7}$                                 | $2 \times 10^{-4}$  | 377            | 1.39          | 0.01                        |
| Stop                                                                                                  | rs17056751        | 158,784,778 | $1 \times 10^{-3}$                                 | 0.35                | 376            | 5.92          | <0.01                       |
| <b>TNIP1 (models fitted including all SNPs within 200 Kb of replicated association at rs17728338)</b> |                   |             |                                                    |                     |                |               |                             |
| Round 1                                                                                               | <b>rs17728338</b> | 150,458,511 | $1 \times 10^{-7}$                                 | $6 \times 10^{-5}$  | 566            | 1.74          | 1.00                        |
| Stop                                                                                                  | rs884520          | 150,464,980 | $9 \times 10^{-5}$                                 | 0.051               | 565            | 2.03          | <0.01                       |

(continued on next page ...)

**Supplementary Table 3 (continued). Results of model building using forward selection with genotyped and imputed SNPs in the vicinity of replicated hits.**

|                                                                                                       | SNP               | Position    | p-value after adjustment for<br>higher ranked SNPs |                     | SNPs<br>Tested | Odds<br>Ratio | r <sup>2</sup><br>(w/replicated SNP) |
|-------------------------------------------------------------------------------------------------------|-------------------|-------------|----------------------------------------------------|---------------------|----------------|---------------|--------------------------------------|
|                                                                                                       |                   |             | w/o Sidak correction                               | w/ Sidak correction |                |               |                                      |
| <b>IL13 (models fitted including all SNPs within 200 Kb of replicated association at rs20541)</b>     |                   |             |                                                    |                     |                |               |                                      |
| Round 1                                                                                               | <b>rs848</b>      | 132,024,399 | 9 x10 <sup>-7</sup>                                | 2x10 <sup>-4</sup>  | 272            | 1.41          | 0.96                                 |
| Stop                                                                                                  | rs2057656         | 131,837,204 | 4 x10 <sup>-3</sup>                                | 0.64                | 271            | 1.20          | < 0.01                               |
| <b>TNFAIP3 (models fitted including all SNPs within 200 Kb of replicated association at rs610604)</b> |                   |             |                                                    |                     |                |               |                                      |
| Round 1                                                                                               | <b>rs582757</b>   | 138,239,517 | 7 x10 <sup>-6</sup>                                | 0.002               | 333            | 1.31          | 0.78                                 |
| Stop                                                                                                  | rs9321627         | 138,064,741 | 1 x10 <sup>-3</sup>                                | 0.38                | 332            | 1.24          | < 0.01                               |
| <b>IL23A (models fitted including all SNPs within 200 Kb of replicated association at rs2066808)</b>  |                   |             |                                                    |                     |                |               |                                      |
| Round 1                                                                                               | <b>rs2066807</b>  | 55,026,949  | 9 x10 <sup>-6</sup>                                | 0.001               | 140            | 1.69          | 1                                    |
| Stop                                                                                                  | rs872103          | 54,954,441  | 3 x10 <sup>-2</sup>                                | 0.98                | 139            | 1.34          | < 0.01                               |
| <b>IL23R (models fitted including all SNPs within 200 Kb of replicated association at rs2201841)</b>  |                   |             |                                                    |                     |                |               |                                      |
| Round 1                                                                                               | <b>rs12119179</b> | 67,520,003  | 2 x10 <sup>-7</sup>                                | 6 x10 <sup>-5</sup> | 267            | 1.35          | 0.58                                 |
| Round 2                                                                                               | <b>rs11465804</b> | 67,475,114  | 5 x10 <sup>-5</sup>                                | 0.01                | 266            | 1.62          | 0.03                                 |
| Stop                                                                                                  | rs10789229        | 67,478,162  | 8 x10 <sup>-3</sup>                                | 0.88                | 265            | 1.18          | 0.26                                 |

**Supplementary Table 4. Evidence for Heterogeneity at Replicated Hits.**

| <b>SNP</b>                   | <b>Chr</b> | <b>Position (Mb)</b> | <b>Cochran's Q</b> | <b>Cochran's Q p-value</b> | <b>I<sup>2</sup> [%]</b> | <b>95% Confidence Interval for I<sup>2</sup></b> | <b>Notable Nearby Genes</b> |
|------------------------------|------------|----------------------|--------------------|----------------------------|--------------------------|--------------------------------------------------|-----------------------------|
| <b>rs12191877</b>            | 6          | 31.36                | 17.59              | 0.0073                     | 65.9                     | [23.6%; 84.8%]                                   | <b><i>HLA-C</i></b>         |
| <b>rs2082412</b>             | 5          | 158.65               | 5.65               | 0.46                       | 0.0                      | [0.0%; 69.0%]                                    | <b><i>IL12B</i></b>         |
| <b>rs17728338</b>            | 5          | 150.46               | 5.19               | 0.52                       | 0.0                      | [0.0%; 66.2%]                                    | <b><i>TNIP1</i></b>         |
| <b>rs20541</b>               | 5          | 132.02               | 6.65               | 0.35                       | 9.8                      | [0.0%; 73.7%]                                    | <b><i>IL13</i></b>          |
| <b>rs610604</b>              | 6          | 138.24               | 7.06               | 0.32                       | 15.0                     | [0.0%; 58.7%]                                    | <b><i>TNFAIP3</i></b>       |
| <b>rs2066808<sup>b</sup></b> | 12         | 55.02                | 6.48               | 0.37                       | 7.4                      | [0.0%; 73.0%]                                    | <b><i>IL23A</i></b>         |
| <b>rs2201841</b>             | 1          | 67.47                | 4.30               | 0.64                       | 0.0                      | [0.0%; 59.3%]                                    | <b><i>IL23R</i></b>         |

Evidence for heterogeneity was evaluated in the seven confirmed loci using Cochran's Q statistic and the I<sup>2</sup> statistic. Slightly stronger (but still non-significant) evidence for heterogeneity was observed at all loci when discovery samples were included in the analysis due to the winner's curse effect.

Supplementary Table 5. Evidence for Association with Psoriatic Arthritis at the Ten Loci Listed in Table 2.

| SNP                          | Chr | Pos (Mb) | Alleles<br>risk/<br>non-risk | Cutaneous Psoriasis Only<br>(3523 cases, 5942 controls) |         |                           | Psoriatic Arthritis Only<br>(1755 cases, 5942 controls) |                        |         | Psoriatic<br>Arthritis<br>vs.<br>Cutaneous<br>Cases<br>(p-value) | Notable<br>Nearby<br>Genes |                           |                                |
|------------------------------|-----|----------|------------------------------|---------------------------------------------------------|---------|---------------------------|---------------------------------------------------------|------------------------|---------|------------------------------------------------------------------|----------------------------|---------------------------|--------------------------------|
|                              |     |          |                              | Frequency <sup>a</sup>                                  |         | OR<br>(meta) <sup>b</sup> | p-value<br>(meta) <sup>c</sup>                          | Frequency <sup>a</sup> |         |                                                                  |                            | OR<br>(meta) <sup>b</sup> | p-value<br>(meta) <sup>c</sup> |
|                              |     |          |                              | Case                                                    | Control |                           |                                                         | Case                   | Control |                                                                  |                            |                           |                                |
| <b>rs12191877</b>            | 6   | 31.36    | T/C                          | .316                                                    | .139    | 2.87                      | $3 \times 10^{-178}$                                    | .260                   | .139    | 2.34                                                             | $6 \times 10^{-62}$        | .006                      | <b>HLA-C</b>                   |
| <b>rs2082412</b>             | 5   | 158.65   | G/A                          | .846                                                    | .797    | 1.42                      | $5 \times 10^{-18}$                                     | .861                   | .797    | 1.63                                                             | $4 \times 10^{-16}$        | .01                       | <b>IL12B</b>                   |
| <b>rs17728338</b>            | 5   | 150.46   | A/G                          | .083                                                    | .054    | 1.56                      | $1 \times 10^{-13}$                                     | .100                   | .054    | 1.78                                                             | $2 \times 10^{-14}$        | .07                       | <b>TNIP1</b>                   |
| <b>rs20541</b>               | 5   | 132.02   | G/A                          | .821                                                    | .787    | 1.24                      | $4 \times 10^{-8}$                                      | .833                   | .787    | 1.34                                                             | $1 \times 10^{-7}$         | .11                       | <b>IL13</b>                    |
| <b>rs610604</b>              | 6   | 138.24   | G/T                          | .364                                                    | .318    | 1.23                      | $3 \times 10^{-10}$                                     | .362                   | .318    | 1.18                                                             | $3 \times 10^{-4}$         | .67                       | <b>TNFAIP3</b>                 |
| <b>rs2066807<sup>d</sup></b> | 12  | 55.03    | C/G                          | .949                                                    | .932    | 1.33                      | $2 \times 10^{-5}$                                      | .955                   | .932    | 1.55                                                             | $9 \times 10^{-6}$         | .23                       | <b>IL23A</b>                   |
| <b>rs2201841</b>             | 1   | 67.47    | G/A                          | .340                                                    | .295    | 1.23                      | $2 \times 10^{-10}$                                     | .318                   | .295    | 1.07                                                             | .142                       | .02                       | <b>IL23R</b>                   |
| <b>rs1076160</b>             | 9   | 134.77   | T/C                          | .499                                                    | .471    | 1.13                      | $6 \times 10^{-5}$                                      | .511                   | .471    | 1.16                                                             | $7 \times 10^{-4}$         | .52                       | <b>TSC1</b>                    |
| <b>rs12983316</b>            | 19  | 10.98    | G/A                          | .166                                                    | .148    | 1.15                      | $7 \times 10^{-4}$                                      | .174                   | .148    | 1.24                                                             | $2 \times 10^{-4}$         | .38                       | <b>SMARCA4</b>                 |
| <b>rs397211</b>              | 2   | 113.61   | T/C                          | .714                                                    | .691    | 1.12                      | $8 \times 10^{-4}$                                      | .712                   | .691    | 1.11                                                             | .024                       | .79                       | <b>IL1RN</b>                   |

<sup>a</sup> Frequency of the risk allele.

<sup>b</sup> Mantel-Haenszel estimator of the common odds ratio.

<sup>c</sup> Two-tailed significance of allelic association across collection centers using the Cochran-Mantel-Haenszel test.

<sup>d</sup> rs2066807 is a genotyped marker in strong LD with rs2066808 ( $r^2 = 1.0$  in HapMap) where we observed the strongest overall evidence for association, but which was imputed in GWAS samples.

**Supplementary Table 6. Differences in Expression between Psoriatic and Normal Skin for Genes Highlighted by Genomewide Scan and Follow-up Analyses.**

| Transcript                                                                                               | Raw Mean Expression (RMA, log scale) |              |              | Uninvolved vs. Control |                                        | Involved vs. Uninvolved |                                         |
|----------------------------------------------------------------------------------------------------------|--------------------------------------|--------------|--------------|------------------------|----------------------------------------|-------------------------|-----------------------------------------|
|                                                                                                          | Control                              | Uninvolved   | Involved     | fold change            | p-value                                | fold change             | p-value                                 |
| <b>Genes in Loci With Confirmed Association (<math>p_{\text{combined}} &lt; 5 \times 10^{-8}</math>)</b> |                                      |              |              |                        |                                        |                         |                                         |
| <b>HLA-C</b>                                                                                             | <b>12.32</b>                         | <b>12.31</b> | <b>12.49</b> | <b>1.00</b>            | <b>0.93</b>                            | <b>1.14</b>             | <b><math>1.7 \times 10^{-10}</math></b> |
| <b>IL12B</b>                                                                                             | <b>4.24</b>                          | <b>4.26</b>  | <b>4.53</b>  | <b>1.01</b>            | <b>0.54</b>                            | <b>1.20</b>             | <b><math>1.1 \times 10^{-14}</math></b> |
| <b>TNIP1</b>                                                                                             | <b>9.62</b>                          | <b>9.45</b>  | <b>10.01</b> | <b>0.90</b>            | <b>0.00024</b>                         | <b>1.47</b>             | <b><math>3.8 \times 10^{-36}</math></b> |
| IL13                                                                                                     | 5.76                                 | 5.86         | 5.93         | 1.07                   | 0.013                                  | 1.05                    | 0.033                                   |
| TNFAIP3                                                                                                  | 8.54                                 | 8.60         | 8.59         | 1.03                   | 0.34                                   | 0.99                    | 0.79                                    |
| <b>IL23A</b>                                                                                             | <b>5.38</b>                          | <b>5.56</b>  | <b>5.83</b>  | <b>1.12</b>            | <b><math>4.9 \times 10^{-5}</math></b> | <b>1.20</b>             | <b><math>4.0 \times 10^{-12}</math></b> |
| IL23R                                                                                                    | 4.29                                 | 4.30         | 4.36         | 1.01                   | 0.77                                   | 1.04                    | 0.051                                   |
| <b>Genes in Loci With Suggestive Association (<math>p_{\text{follow-up}} &lt; 0.05</math>)</b>           |                                      |              |              |                        |                                        |                         |                                         |
| TSC1                                                                                                     | 6.94                                 | 6.88         | 6.79         | 0.96                   | 0.055                                  | 0.94                    | 0.00090                                 |
| SMARCA4                                                                                                  | 7.09                                 | 7.11         | 7.20         | 1.01                   | 0.55                                   | 1.06                    | 0.0053                                  |
| IL1RN                                                                                                    | 7.65                                 | 7.76         | 8.48         | 1.08                   | 0.018                                  | 1.64                    | $8.2 \times 10^{-34}$                   |

The table summarizes differences in expression levels for genes in regions of replicated association. The first column indicates the gene name for each of the transcripts investigated. When multiple transcripts for a gene were present on Affymetrix U133 2.0A arrays, results were averaged across all transcripts for the same gene. The next three columns summarize average of RMA expression levels for each tissue type. The last four columns summarize differences in expression levels between uninvolved and normal skin and between involved and uninvolved skin.

In comparisons of involved and uninvolved skin, approximately 25% of all genes show differences in expression similar to those observed for *HLA-C*, and thus we estimate the probability that among seven randomly selected genes four or more would show differences such as the highlighted genes is  $\sim 0.066$ .

**Supplementary Table 7. Comparison with the top of Hits of Previously Published Scans.**

| SNP                   | Chr | Pos (Mb) | Alleles risk/non-risk | Capon et al. <sup>26</sup> Total Sample (2679 cases, 2215 controls) |         |      |                    | This Study, Discovery Sample (1359 cases, 1400 controls) |         |      |                    | Notable Nearby Genes |
|-----------------------|-----|----------|-----------------------|---------------------------------------------------------------------|---------|------|--------------------|----------------------------------------------------------|---------|------|--------------------|----------------------|
|                       |     |          |                       | Frequency                                                           |         | OR   | p-value            | Frequency                                                |         | OR   | p-value            |                      |
|                       |     |          |                       | Case                                                                | Control |      |                    | Case                                                     | Control |      |                    |                      |
| rs495337 <sup>a</sup> | 20  | 47.9     | C/T                   | .61                                                                 | .55     | 1.25 | 1×10 <sup>-8</sup> | .63                                                      | .58     | 1.23 | 2×10 <sup>-4</sup> | ZNF313/RNF114        |

  

| SNP        | Chr | Pos (Mb) | Alleles risk/non-risk | Liu et al. <sup>27</sup> Total Sample (960 cases, 1256 controls) |         |      |                    | This Study, Discovery Sample <sup>b</sup> (924 cases, 1156 controls) |         |      |         | Notable Nearby Genes  |
|------------|-----|----------|-----------------------|------------------------------------------------------------------|---------|------|--------------------|----------------------------------------------------------------------|---------|------|---------|-----------------------|
|            |     |          |                       | Frequency                                                        |         | OR   | p-value            | Frequency                                                            |         | OR   | p-value |                       |
|            |     |          |                       | Case                                                             | Control |      |                    | Case                                                                 | Control |      |         |                       |
| rs6701216  | 1   | 151.0    | T/C                   | .17                                                              | .13     | 1.45 | 5×10 <sup>-5</sup> | .15                                                                  | .14     | 1.09 | .305    | <i>EDC cluster</i>    |
| rs2164807  | 2   | 85.8     | G/A                   | .47                                                              | .39     | 1.35 | 2×10 <sup>-5</sup> | .43                                                                  | .43     | 1.00 | .926    | <i>GNLY-ATOH8</i>     |
| rs11126740 | 2   | 79.7     | C/T                   | .69                                                              | .62     | 1.28 | 1×10 <sup>-4</sup> | .66                                                                  | .64     | 1.08 | .170    | <i>CTNNA2</i>         |
| rs6804331  | 3   | 105.2    | C/A                   | .45                                                              | .38     | 1.30 | 3×10 <sup>-4</sup> | .41                                                                  | .41     | 0.97 | .651    | (gene desert)         |
| rs3812888  | 13  | 39.1     | C/T                   | .43                                                              | .35     | 1.38 | 1×10 <sup>-5</sup> | .41                                                                  | .39     | 1.07 | .287    | <i>COG6</i>           |
| rs7993214  | 13  | 39.2     | C/T                   | .72                                                              | .65     | 1.41 | 2×10 <sup>-6</sup> | .33                                                                  | .35     | 1.08 | .244    | <i>COG6</i>           |
| rs2282276  | 14  | 94.7     | G/A                   | .10                                                              | .07     | 1.40 | 3×10 <sup>-3</sup> | .10                                                                  | .08     | 1.29 | .031    | <i>CLMN</i>           |
| rs4775912  | 15  | 49.1     | G/A                   | .19                                                              | .15     | 1.41 | 6×10 <sup>-5</sup> | .17                                                                  | .17     | 0.99 | .869    | <i>USP8-TNFAIP8L3</i> |
| rs3803369  | 15  | 49.2     | A/G                   | .20                                                              | .15     | 1.43 | 3×10 <sup>-5</sup> | .17                                                                  | .17     | 0.99 | .878    | <i>USP8-TNFAIP8L3</i> |

<sup>a</sup> The marker rs495337 was not examined in our sample. Instead, we report results for rs2235617, a nearby SNP with  $r^2 = 1.0$ .

<sup>b</sup> Results for this study exclude samples collected by Dr. Bowcock's group (row 3 in Table 1), since those overlap in part with the Liu et al. samples.



## **SUPPLEMENTARY FIGURE**

### **Supplementary Figure 1. Gene Expression Data for the Ten Loci Listed in Table 2.**

For each of the transcripts examined, robust multi-chip average (RMA) expression levels were plotted after adjustment for batch and sex effects (Irizarry, R.A. et al. Summaries of Affymetrix GeneChip probe level data. *Nucleic Acids Res* 31, e15, 2003). We calculated the average impact of sex and batch on gene expression and then subtracted these from the measured RMA levels before plotting). The plots include both individual measurements and box-plots summarizing trait distribution for each of the transcripts.

**HLA-C**  
(PN vs. NN  $p = 0.93$ ; PP vs. PN  $p = 1.7e-10$ )

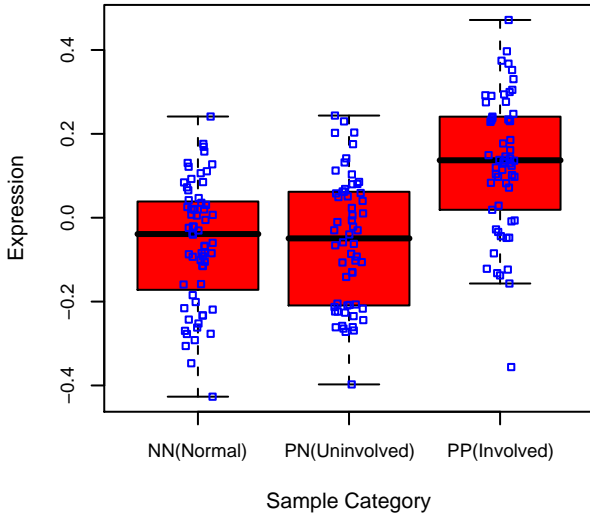

**IL12B**  
(PN vs. NN  $p = 0.54$ ; PP vs. PN  $p = 1.1e-14$ )

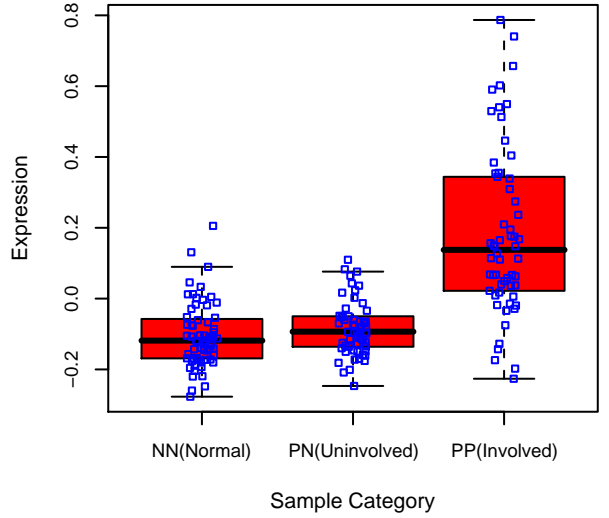

**TNIP1**  
(PN vs. NN  $p = 0.00024$ ; PP vs. PN  $p = 3.8e-36$ )

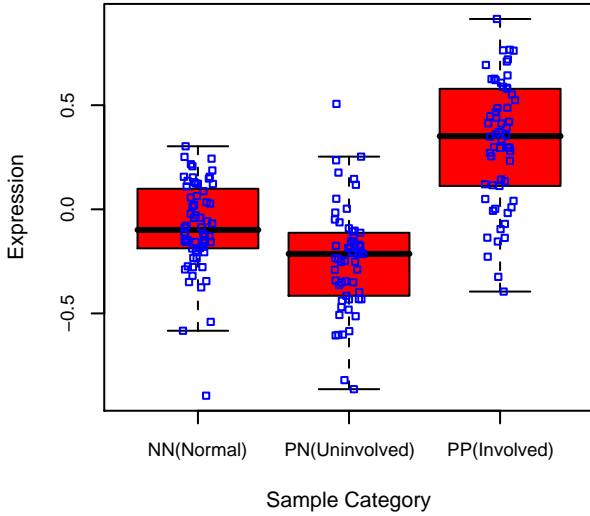

**IL13**  
(PN vs. NN  $p = 0.013$ ; PP vs. PN  $p = 0.033$ )

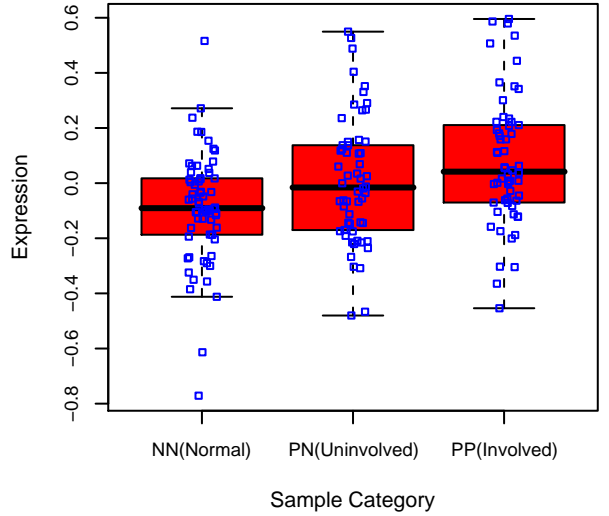

**TNFAIP3**  
(PN vs. NN  $p = 0.34$ ; PP vs. PN  $p = 0.79$ )

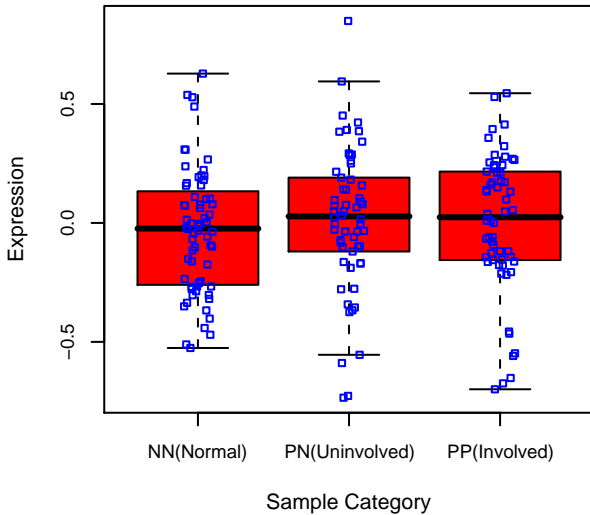

**IL23A**  
(PN vs. NN  $p = 4.9e-05$ ; PP vs. PN  $p = 4e-12$ )

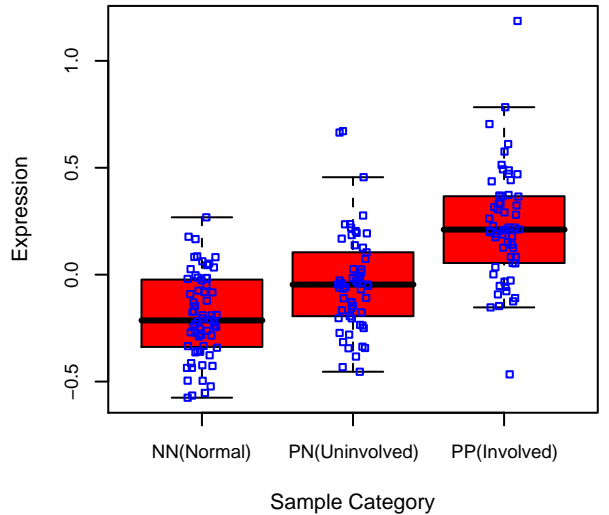

**IL23R**  
( PN vs. NN  $p = 0.77$ ; PP vs. PN  $p = 0.051$  )

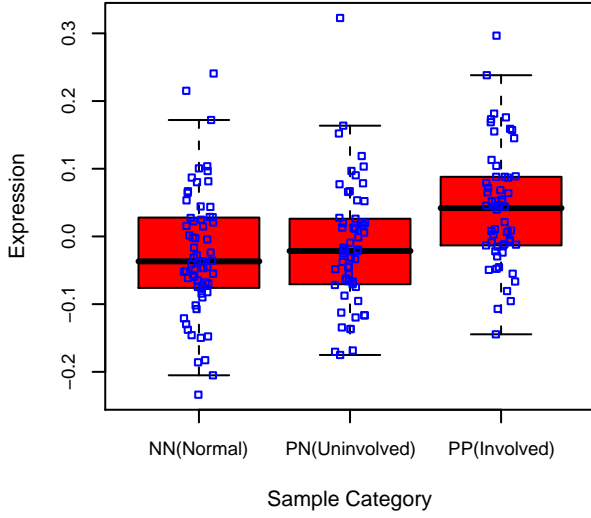

**TSC1**  
( PN vs. NN  $p = 0.055$ ; PP vs. PN  $p = 9e-04$  )

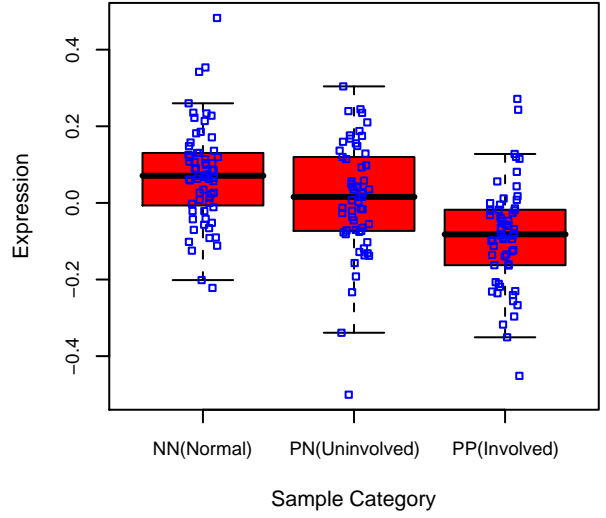

**SMARCA4**  
( PN vs. NN  $p = 0.55$ ; PP vs. PN  $p = 0.0053$  )

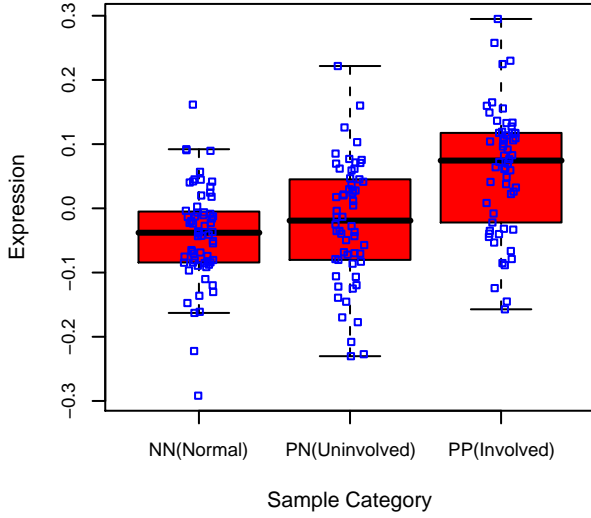

**IL1RN**  
( PN vs. NN  $p = 0.018$ ; PP vs. PN  $p = 8.2e-34$  )

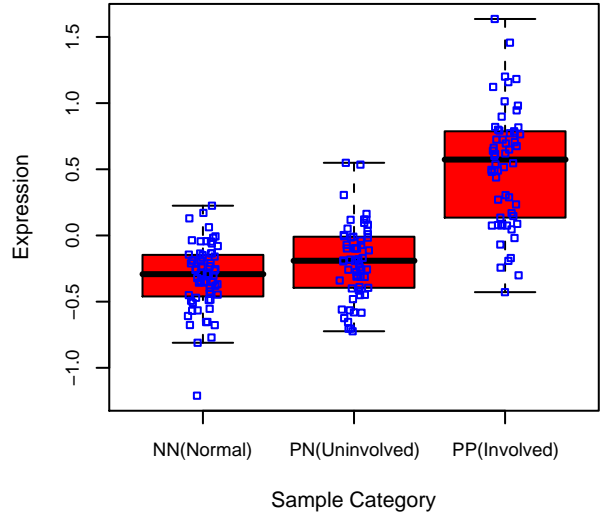

Supplement: NIHMS83342-supplement-1.pdf [file NIHMS83342-supplement-1.pdf]
